# Supplementary material for: Evidence of SARS-CoV-2 infection in gallbladder and aggravating cholecystitis to septic shock: a case report
Source: PubMed Central journal article supplement — Ann Transl Med. 2021 Nov;9(21):1631. doi: 10.21037/atm-21-4778 (PMC8640915; doi:10.21037/atm-21-4778), 2021-11
Supplement: atm-09-21-1631-supplementary.pdf [file atm-09-21-1631-supplementary.pdf]

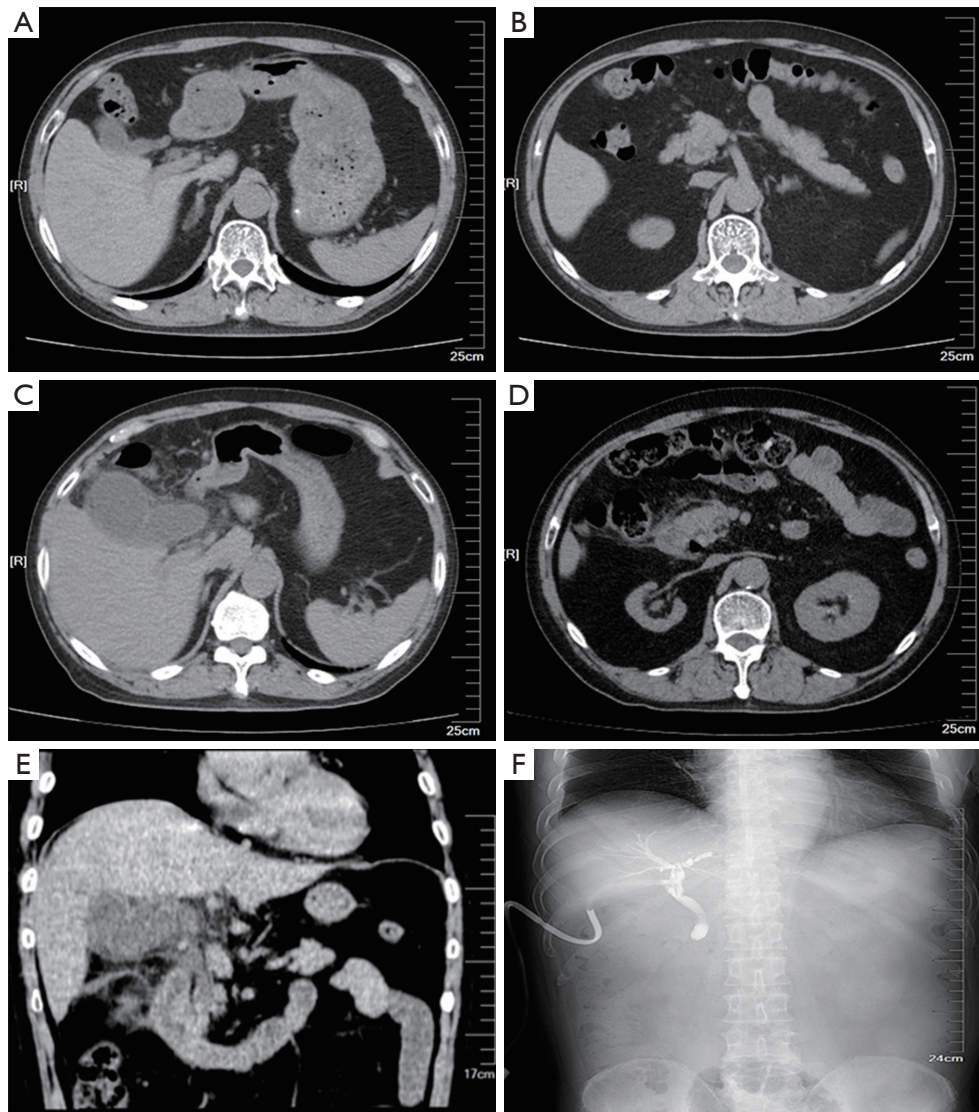

**Figure S1** Representative abdominal imaging in the COVID-19 patients with biliary infection rapidly progressing to sepsis. Representative abdominal imaging from the COVID-19 patient, the abdominal CT scan on 17 February 2020 showed that the gallbladder was normal without edema and exudation (A) and the CBD stones were found at the inferior extremity of CBD (B). The gallbladder was swelling with thick wall and exudation (C) and the CBD stones was still at the inferior extremity of CBD (D) on 5 March 2020. After three-dimensional reconstruction, we found that the stone was in the neck of the gallbladder and the CBD was slightly dilated caused by the CBD stones (E). A T-tube cholangiography was conducted to make sure the clearance of the CBD stones on 20 March 2020 (F). COVID-19, coronavirus disease 2019; CT, computed tomography; CBD, common bile duct.

**Table S1** The detailed information of antibodies

| Antibody to | Mono/polyclonal | Clone    | Application (dilution) |
|-------------|-----------------|----------|------------------------|
| CD2         | Mouse           | AB75     | IHC (ready-to-use)     |
| CD3         | Rabbit          | SP7      | IHC (ready-to-use)     |
| CD4         | Rabbit          | EP204    | IHC (ready-to-use)     |
| CD8         | Mouse           | SP16     | IHC (ready-to-use)     |
| CD20        | Mouse           | L26      | IHC (ready-to-use)     |
| CD38        | Mouse           | MXO44    | IHC (ready-to-use)     |
| CD68        | Mouse           | KP1      | IHC (ready-to-use)     |
| MPO         | Rabbit          | RAB-0379 | IHC (ready-to-use)     |

IHC, immunohistochemistry.

**Table S2** Results of lymphocyte subpopulations in peripheral blood of the patient with SARS-CoV-2 infection

| Parameter                                                                  | Reference range | Jan. 30 | Feb. 1 | Feb. 2 | Feb. 3 | Feb. 5 | Feb. 7 | Feb. 9 | Feb. 11 | Feb. 13 | Feb. 15 | Mar. 7 |
|----------------------------------------------------------------------------|-----------------|---------|--------|--------|--------|--------|--------|--------|---------|---------|---------|--------|
| CD3 <sup>+</sup> lymphocytes count (per $\mu$ L)                           | 955–2,860       | 1,054   | 905    | 1,512  | 1,920  | 1,741  | 1,469  | 1,292  | 1,066   | 1,142   | 1,180   | 68     |
| CD3 <sup>+</sup> T cells count/lymphocytes count (%)                       | 50–84           | 58.31   | 60.77  | 63.30  | 66.25  | 67.46  | 68.05  | 71.54  | 66.80   | 68.81   | 70.55   | 35.35  |
| CD3 <sup>+</sup> CD4 <sup>+</sup> lymphocytes count (per $\mu$ L)          | 550–1,440       | 596     | 538    | 926    | 1,184  | 1,037  | 882    | 826    | 650     | 723     | 795     | 40     |
| CD3 <sup>+</sup> CD4 <sup>+</sup> T cells count/lymphocytes count (%)      | 27–51           | 33.00   | 36.13  | 38.77  | 40.85  | 40.19  | 40.88  | 45.75  | 40.74   | 43.58   | 47.51   | 20.86  |
| CD3 <sup>+</sup> CD8 <sup>+</sup> lymphocytes count (per $\mu$ L)          | 320–1,250       | 331     | 287    | 465    | 519    | 519    | 468    | 376    | 337     | 342     | 338     | 22     |
| CD3 <sup>+</sup> CD8 <sup>+</sup> T cells count/lymphocytes count (%)      | 15–44           | 18.33   | 19.26  | 19.47  | 17.90  | 20.11  | 21.69  | 20.85  | 21.14   | 20.61   | 20.21   | 11.43  |
| CD3 <sup>+</sup> CD4 <sup>+</sup> /CD3 <sup>+</sup> CD8 <sup>+</sup> ratio | 0.71–2.78       | 1.80    | 1.87   | 1.99   | 2.28   | 2.00   | 1.88   | 2.20   | 1.93    | 2.11    | 2.35    | 1.82   |
